# Supplementary material for: Policy Recommendations From Transmission Modeling for the Elimination of Visceral Leishmaniasis in the Indian Subcontinent
Source: PubMed Central journal article supplement (PMC5982727; doi:10.1093/cid/ciy007), 2018-06-01
Supplement: ciy007_suppl_supplementary_figure_3.pdf [file ciy007_suppl_supplementary_figure_3.pdf]

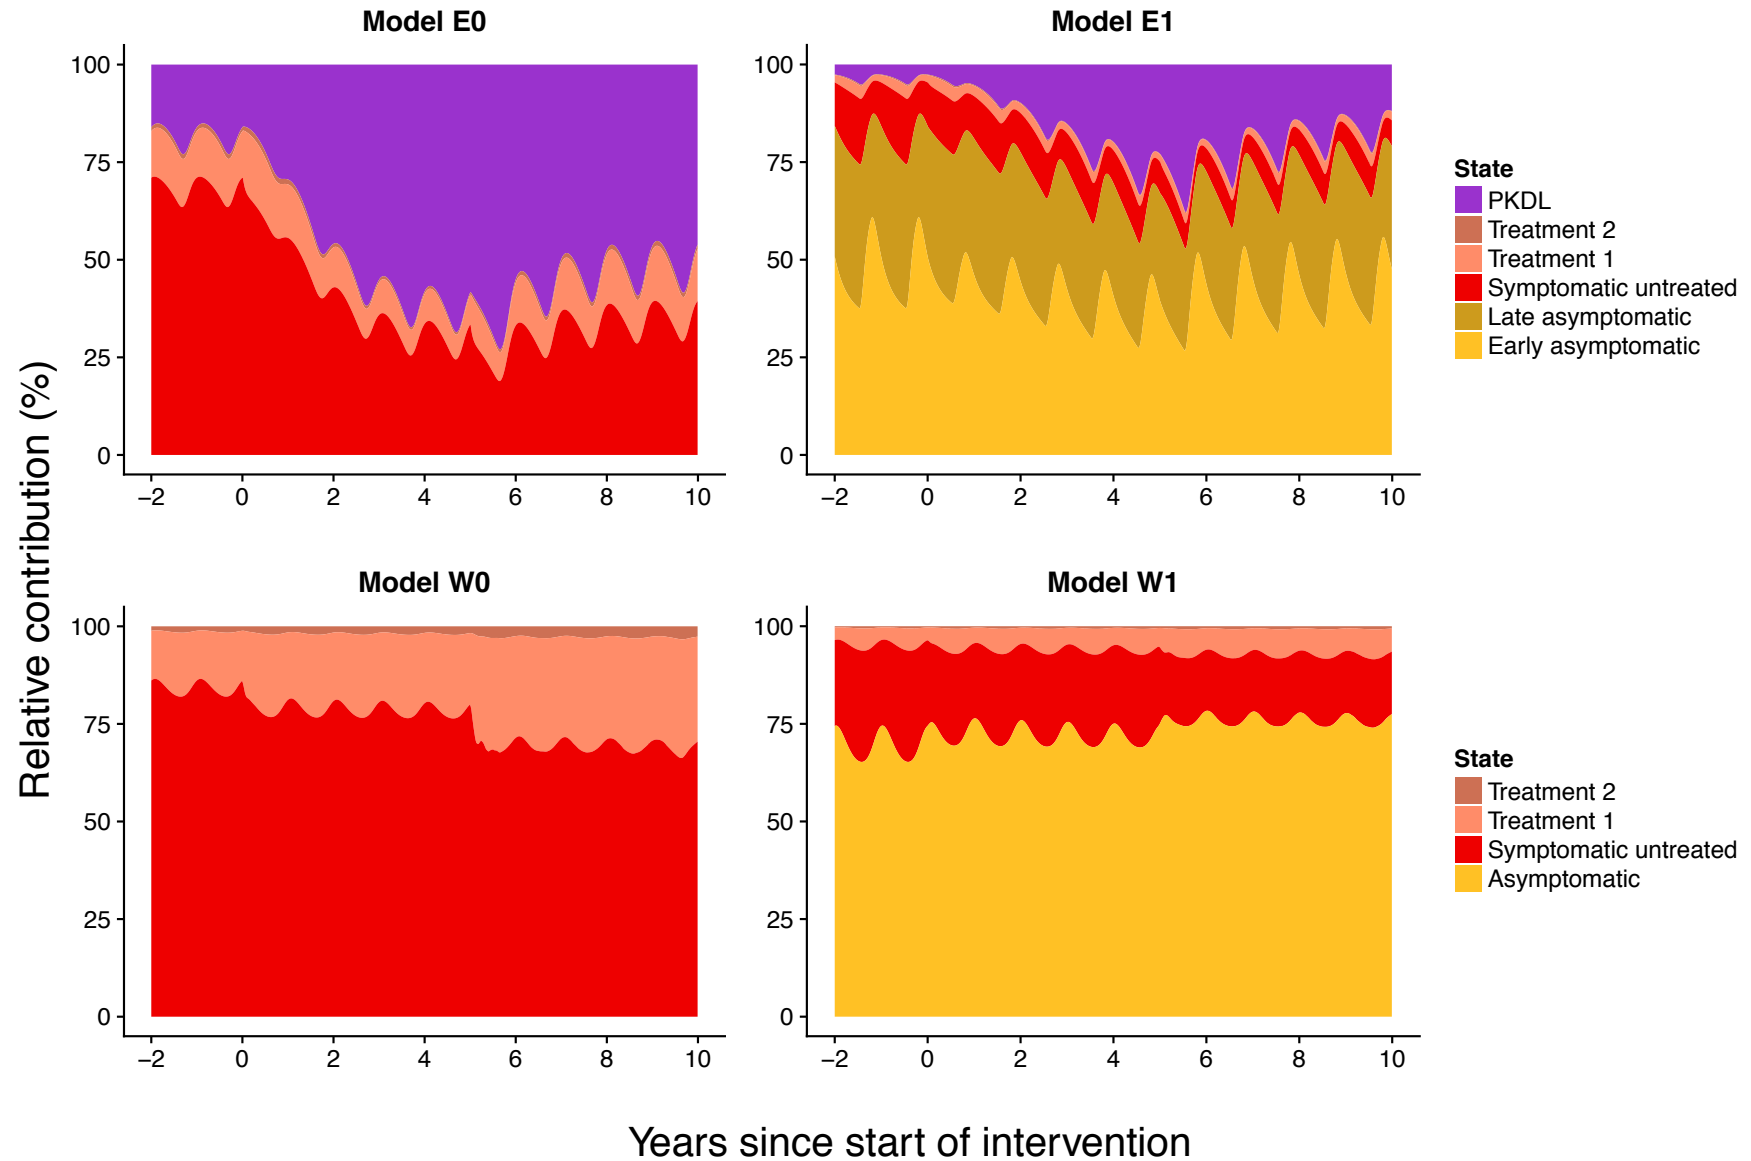

**Supplementary Figure 3. Relative contribution of different disease states to VL transmission over time during the WHO-recommended interventions for all four models.** In models E0 and W0 (left), only symptomatic individuals contribute to transmission. In models E1 and W1 (right), asymptomatic individuals are the main contributors to transmission. All graphs are for a 10/10,000/yr pre-control endemicity setting with a 5-year attack phase followed by the consolidation phase.
